# Supplementary material for: Utility of human judgment ensembles during times of pandemic uncertainty: A case study during the COVID-19 Omicron BA.1 wave in the USA
Source: bioRxiv or medRxiv preprint supplement (doi:10.1101/2022.10.12.22280997), 2022-10-13

## SUPPLEMENTARY MATERIAL

### Utility of human judgment ensembles during times of pandemic uncertainty: A case study during the COVID-19 Omicron BA.1 wave in the USA

Srinivasan Venkatramanan<sup>1,\*</sup>, Juan Cambeiro<sup>2</sup>, Tom Liptay<sup>2</sup>, Bryan Lewis<sup>1</sup>, Mark Orr<sup>1</sup>, Gaia Dempsey<sup>2</sup>, Alex Telionis<sup>3</sup>, Justin Crow<sup>3</sup>, Chris Barrett<sup>1,4</sup>, Madhav Marathe<sup>1,4</sup>

<sup>1</sup>Biocomplexity Institute & Initiative, University of Virginia

<sup>2</sup>Metaculus Inc.

<sup>3</sup>Virginia Department of Health

<sup>4</sup>Department of Computer Science, University of Virginia

\*Corresponding author: [srini@virginia.edu](mailto:srini@virginia.edu)

**Table S1: Questions in each tournament round**

| Target                              | Round - Forecast Horizon |            |           |        |        |        |
|-------------------------------------|--------------------------|------------|-----------|--------|--------|--------|
|                                     | R1                       | R2         | R3        | R4     | R5     | R6     |
| 7-day avg. reported cases           | 2,4,8* wk                | 2,4*,8* wk | 2*,4,8 wk | 2,4 wk | 2,4 wk | 2,4 wk |
| Fully vaccinated coverage (%)       | 4wk                      | 4wk        | 4wk       | X      | X      | X      |
| 5-11yr old vaccine coverage (%)     | 4wk                      | 4wk        | 4wk       | X      | X      | X      |
| Booster coverage (%)                | 4wk                      | 4wk        | 4wk       | 4,8 wk | 4,8 wk | 4,8 wk |
| 7-day avg. current hospitalizations | X                        | X          | X         | 2,4 wk | 2,4 wk | 2,4 wk |
| Highest 7-day avg cases - timing    | 12wk                     | 12wk       | 12wk      | 12wk   | 12wk   | 12wk   |
| Highest 7-day avg cases - count     | 12wk*                    | 12wk*      | 12wk      | 12wk   | 12wk   | 12wk   |
| Lowest 7-day avg cases - timing     | 12wk                     | 12wk       | 12wk      | 12wk   | 12wk   | 12wk   |
| Lowest 7-day avg cases - count      | 12wk                     | 12wk       | 12wk      | 12wk   | 12wk   | 12wk   |

\*case targets for R1(8wk), R2(4wk, 8wk), R3(2wk), and peak targets for R1,R2 were out of range (see Table S3).

**Table S2: Time windows and horizons corresponding to each round**

| R# | Start time*                 | Close time†                 | 2 wk                        | 4wk                         | 8wk                         | 12wk                        |
|----|-----------------------------|-----------------------------|-----------------------------|-----------------------------|-----------------------------|-----------------------------|
| 1  | Nov 12 <sup>th</sup> , 2021 | Dec 3 <sup>rd</sup> , 2021  | Nov 26 <sup>th</sup> , 2021 | Dec 10 <sup>th</sup> , 2021 | Jan 7 <sup>th</sup> , 2022  | Feb 4 <sup>th</sup> , 2022  |
| 2  | Dec 3 <sup>rd</sup> , 2021  | Dec 24 <sup>th</sup> , 2021 | Dec 17 <sup>th</sup> , 2021 | Dec 31 <sup>st</sup> , 2021 | Jan 28 <sup>th</sup> , 2022 | Feb 25 <sup>th</sup> , 2022 |
| 3  | Dec 24 <sup>th</sup> , 2021 | Jan 14 <sup>th</sup> , 2022 | Jan 7 <sup>th</sup> , 2022  | Jan 21 <sup>st</sup> , 2022 | Feb 18 <sup>th</sup> , 2022 | Mar 18 <sup>th</sup> , 2022 |
| 4  | Jan 14 <sup>th</sup> , 2022 | Feb 4 <sup>th</sup> , 2022  | Jan 28 <sup>th</sup> , 2022 | Feb 11 <sup>th</sup> , 2022 | Mar 11 <sup>th</sup> , 2022 | Apr 8 <sup>th</sup> , 2022  |
| 5  | Feb 4 <sup>th</sup> , 2022  | Feb 25 <sup>th</sup> , 2022 | Feb 18 <sup>th</sup> , 2022 | Mar 4 <sup>th</sup> , 2022  | Apr 1 <sup>st</sup> , 2022  | Apr 29 <sup>th</sup> , 2022 |
| 6  | Feb 25 <sup>th</sup> , 2022 | Mar 18 <sup>th</sup> , 2022 | Mar 11 <sup>th</sup> , 2022 | Mar 25 <sup>th</sup> , 2022 | Apr 22 <sup>nd</sup> , 2022 | May 20 <sup>th</sup> , 2022 |

\*Start and Close times are Friday 12PM EST. Each round lasted three weeks.

†2wk ahead questions are closed 1 week from start time

**Table S3: Case forecast questions with ground truth above upper bound.**

| short_code   | Upper bound | Ground truth |
|--------------|-------------|--------------|
| R1_8wk       | 8000        | 14645        |
| R2_4wk       | 6000        | 9883         |
| R2_8wk       | 8000        | 10556        |
| R3_2wk       | 10000       | 14645        |
| R1_peak_12wk | 10000       | 18782        |
| R2_peak_12wk | 10000       | 18782        |

**Figure S1: Number of unique users and predictions across rounds**

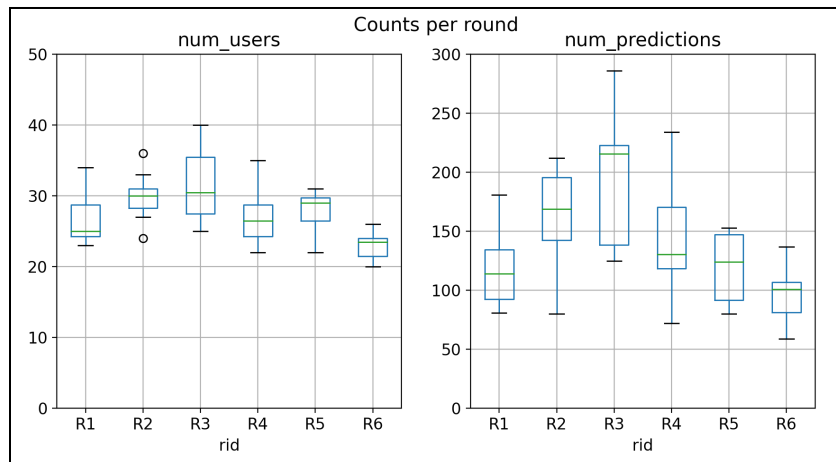

Supplement: Supplementary file [file media-1.pdf]
